# Supplementary material for: Reducing Iron Content in Infant Formula from 8 to 2 mg/L Does Not Increase the Risk of Iron Deficiency at 4 or 6 Months of Age: A Randomized Controlled Trial
Source: MDPI journal article supplement (doi:10.3390/nu13010003), 2020-12-22
Supplement: s1 [file s1]

# Reducing iron content in infant formula from 8 to 2 mg/L does not increase the risk of iron deficiency at 4 or 6 months of age: a randomized controlled trial

Maria Björnsjö<sup>1</sup>, MD, Olle Hernell<sup>1</sup>, MD, PhD, Bo Lönnerdal<sup>2</sup>, PhD, Staffan K Berglund<sup>1,3\*</sup>, MD, PhD

## Supplementary Material

**Supplemental Table S2. Dietary intake according to 3-day dietary diary during the infant formula intervention.**

|                                                        | Lf+       | Lf-       | CF        | p-value | BF        |
|--------------------------------------------------------|-----------|-----------|-----------|---------|-----------|
| <b>Formula intake per day, ml</b>                      |           |           |           |         |           |
| 2 months                                               | 808±150   | 816±133   | 823±135   | .88     | N/A       |
| 3 months                                               | 868±164   | 836±133   | 857±149   | .46     | N/A       |
| 4 months                                               | 908±148   | 889±149   | 955±138   | .12     | N/A       |
| 5 months                                               | 945±204   | 898±173   | 896±166   | .27     | N/A       |
| 6 months                                               | 781±262   | 764±227   | 669±326   | .22     | N/A       |
| <b>Iron intake from infant formula, mg/kg/day</b>      |           |           |           |         |           |
| 2 months                                               | 0.29±0.05 | 0.30±0.05 | 1.21±0.20 | < .001  | N/A       |
| 3 months                                               | 0.28±0.05 | 0.27±0.04 | 1.09±0.19 | < .001  | N/A       |
| 4 months                                               | 0.26±0.04 | 0.26±0.04 | 1.09±0.15 | < .001  | N/A       |
| 5 months                                               | 0.25±0.05 | 0.24±0.04 | 0.94±0.18 | < .001  | N/A       |
| 6 months                                               | 0.19±0.06 | 0.19±0.06 | 0.65±0.32 | < .001  | N/A       |
| <b>Iron intake from complementary foods, mg/kg/day</b> |           |           |           |         |           |
| 4 months                                               | 0.00±0.01 | 0.00±0.01 | 0.02±0.13 | .13     | 0.01±0.03 |
| 5 months                                               | 0.02±0.06 | 0.04±0.08 | 0.05±0.11 | .21     | 0.05±0.12 |
| 6 months                                               | 0.26±0.31 | 0.21±0.35 | 0.31±0.32 | .41     | 0.17±0.29 |

Values are presented as mean ± SD.

Infants partly fed another formula than the study formula were excluded (4 at 2 mo, 3 at 3 mo, 4 at 4 mo, 3 at 5 mo, 10 at 6 mo)
