# Supplementary material for: Reducing Iron Content in Infant Formula from 8 to 2 mg/L Does Not Increase the Risk of Iron Deficiency at 4 or 6 Months of Age: A Randomized Controlled Trial
Source: MDPI journal article supplement (doi:10.3390/nu13010003), 2020-12-22
Supplement: s1 [file s1]

# Reducing iron content in infant formula from 8 to 2 mg/L does not increase the risk of iron deficiency at 4 or 6 months of age: a randomized controlled trial

Maria Björmsjö<sup>1</sup>, MD, Olle Hernell<sup>1</sup>, MD, PhD, Bo Lönnerdal<sup>2</sup>, PhD, Staffan K Berglund<sup>1,3\*</sup>, MD, PhD

## Supplementary Material

**Supplemental Table S1. Study formula composition.**

| <b>NUTRIENT per 100 ml</b>  | <b>Lf-</b> | <b>Lf+</b> | <b>CF</b> |
|-----------------------------|------------|------------|-----------|
| Energy, kcal                | 68         | 68         | 68        |
| Protein, g                  | 1.4        | 1.4        | 1.4       |
| Including Lactoferrin, g    | 0          | 0.1        | 0         |
| Fat, g                      | 3.7        | 3.7        | 3.7       |
| Total carbohydrates*, g     | 7.4        | 7.4        | 7.4       |
| Polydextrose (PDX) , g      | 0.2        | 0.2        | 0.2       |
| Vitamin A - Total, IU       | 204        | 204        | 204       |
| Vit D (cholecalciferol), IU | 42         | 42         | 42        |
| Vitamin E - Total, IU       | 1.2        | 1.2        | 1.2       |
| Vitamin K, µg               | 5          | 5          | 5         |
| Vitamin B1 (thiamin), µg    | 54         | 54         | 54        |
| Vitamin B2 (riboflavin), µg | 122        | 122        | 122       |
| Vitamin B6 (pyridoxine), µg | 41         | 41         | 41        |
| Vitamin B12, µg             | 0.18       | 0.18       | 0.18      |
| Niacin (vitamin B3), µg     | 544        | 544        | 544       |
| Folic Acid - Total, mg      | 11         | 11         | 11        |
| Vitamin C, mg               | 14         | 14         | 14        |
| Calcium, mg                 | 53         | 53         | 53        |
| Phosphorus, mg              | 29         | 29         | 29        |
| Magnesium, mg               | 5          | 5          | 5         |
| Iron, mg                    | 0.2        | 0.2        | 0.8       |
| Zinc, mg                    | 0.7        | 0.7        | 0.7       |
| Sodium, mg                  | 20         | 20         | 20        |
| Potassium, mg               | 82         | 82         | 82        |
| Chloride, mg                | 48         | 48         | 48        |

\* Including a 0.4 g blend of polydextrose (PDX) and galacto-oligosaccharides (GOS) in 1:1 ratio
